# Supplementary material
Source: Research Square preprint supplement (doi:10.21203/rs.3.rs-9656130/v1)
Supplement: Supplementary file 1 [file 4a7eeddab73c108e73728521.pdf]

# 1 **Global utility-scale photovoltaics are structurally displaced from electricity**

## 2 **demand centres**

3 Boxiong Su<sup>1,2</sup>, Mingquan Wu<sup>1,2,\*</sup>, Jie Liu<sup>1,4</sup>, Feng Yan<sup>3</sup>, Zheng Niu<sup>1,2</sup>, Fang Chen<sup>1,2</sup>,  
4 Meng Wang<sup>4</sup>, Wang Li<sup>1,2</sup>, Zongru Li<sup>2,5</sup>, Hanguang Yu<sup>6</sup>

- 5 1. International Research Center of Big Data for Sustainable Development Goals, State Key  
6 Laboratory of Remote Sensing and Digital Earth, Aerospace Information Research Institute,  
7 Chinese Academy of Sciences, Beijing 100094, China;
- 8 2. University of Chinese Academy of Sciences, Beijing 100049, China;
- 9 3. Foreign Environmental Cooperation Center, Ministry of Ecology and Environment of China,  
10 Beijing 100812, China;
- 11 4. International Cooperation Office, Aerospace Information Research Institute, Chinese  
12 Academy of Sciences, Beijing 100094, China
- 13 5. State Key Laboratory of Geographic Information Science and Technology, Institute of  
14 Geographic Sciences and Natural Resources Research, Chinese Academy of Sciences,  
15 Beijing, 100101, China
- 16 6. School of Artificial Intelligence, China University of Geosciences (Beijing), Beijing 100083,  
17 China

18 Corresponding author: Mingquan Wu (wumq@aircas.ac.cn)

## 19 **Supplementary Information**

### 20 **Supplementary Methods**

#### 21 **S1. Global utility-scale PV mapping**

##### 22 **S1.1 Sample construction and Sentinel-2 input features**

23 Model inputs were derived from Sentinel-2 multispectral surface reflectance,  
24 which was used to capture spectral differences between PV installations and  
25 surrounding land surfaces across the visible, near-infrared and shortwave-infrared  
26 ranges. Ten bands were selected as input features: B2, B3, B4, B5, B6, B7, B8, B8A,  
27 B11 and B12.

28 Positive samples were obtained from an existing global PV distribution dataset<sup>18</sup>.  
29 Negative samples were generated by random sampling outside a 1-km buffer  
30 surrounding known PV samples, so as to reduce interference from roads, bare land,  
31 industrial sites and other highly reflective backgrounds during model training. For all  
32 sample locations, multispectral reflectance values were extracted in Google Earth  
33 Engine at the corresponding pixel positions, and compiled into a binary labelled sample  
34 set.

35 To improve training stability and reduce the influence of scale differences among  
36 spectral bands, all input features were standardized using statistics calculated from the  
37 training set, and the same normalization parameters were then applied consistently to

38 the validation and test sets. The samples were split by stratified sampling into training,  
 39 validation and test subsets to preserve the class proportions of PV and non-PV samples.  
 40 Detailed sample statistics and descriptions of the input bands are provided in  
 41 Supplementary Table 2.

## 42 **S1.2 Model training and global-scale inference**

43 PV samples were extracted from the existing global PV distribution dataset,  
 44 whereas non-PV samples were obtained by random sampling outside a 1-km buffer  
 45 surrounding PV samples. All samples were processed in Google Earth Engine, where  
 46 spectral values were extracted according to site location and exported to form a labelled  
 47 dataset with a binary field, label\_mode. To reduce scale differences among spectral  
 48 bands and improve convergence stability, all input features were standardized to zero  
 49 mean and unit variance. The normalization parameters were calculated from the  
 50 training set and then applied to the validation and test sets. The full sample set was  
 51 divided by stratified sampling into training (70%), validation (15%) and test (15%)  
 52 subsets to ensure consistent PV/non-PV class proportions across all partitions.

53 The classifier was a lightweight three-layer fully connected neural network (Fully  
 54 Connected Deep Neural Network, FC-DNN). The input layer takes a 10-dimensional  
 55 feature vector. Two hidden layers, with 32 and 64 neurons and ReLU activation, are  
 56 used for nonlinear mapping, followed by a sigmoid-activated output layer that produces  
 57 a probability value between 0 and 1 (Table 1), representing the confidence that a given  
 58 pixel corresponds to a PV installation. The total number of network parameters is  
 59 approximately  $2.5 \times 10^3$ , allowing efficient inference over large areas.

60 The forward propagation of the network can be written as:

$$\begin{aligned} 61 \quad h_1 &= \text{ReLU}(xW_1 + b_1), \\ 62 \quad h_2 &= \text{ReLU}(h_1W_2 + b_2), \\ 63 \quad \hat{y} &= \sigma(h_2W_3 + b_3), \end{aligned}$$

64 where  $\sigma$  denotes the sigmoid function and  $\hat{y} \in (0,1)$  is the predicted probability that the  
 65 pixel belongs to a PV installation.

66 Model training was performed in PyTorch using the binary cross-entropy loss function:

$$67 \quad L = -\frac{1}{N} \sum_{i=1}^N [y_i \log(\hat{y}_i) + (1 - y_i) \log(1 - \hat{y}_i)].$$

68 The optimizer was stochastic gradient descent (SGD), with a learning rate of 0.001,  
 69 a batch size of 32 and 100 training epochs. After each epoch, model performance on  
 70 the validation set was evaluated using overall accuracy (OA), precision (P), recall (R)  
 71 and F1-score to monitor convergence and generalization. All training was conducted in  
 72 a GPU (CUDA) environment.

73 To evaluate classification performance comprehensively, we used the following  
 74 metrics:

$$\begin{aligned} 75 \quad OA &= \frac{TP + TN}{TP + TN + FP + FN}, \\ 76 \quad P &= \frac{TP}{TP + FP}, \end{aligned}$$

77

$$R = \frac{TP}{TP + FN},$$

78

$$F1 = \frac{2PR}{P + R},$$

79

where  $TP$ ,  $FP$ ,  $TN$  and  $FN$  denote the numbers of true positives, false positives, true negatives and false negatives, respectively.

80

### 81 **S1.3 Post-processing and extraction of utility-scale PV assets**

82

The raw model output is a 10-m raster of PV occurrence probability. To derive a high-quality and physically meaningful PV map suitable for subsequent estimation of generation capacity and matching with electricity demand, we further post-processed the probability surface through probability thresholding, binarization, removal of small patches, spatial aggregation and exclusion of anomalously large patches.

84

85

86

#### 87 **Elevation, slope, snow and glacier masks**

88

To remove, at an early stage, areas that are unsuitable for PV development and prone to false detections, we applied pixel-wise topographic and cryospheric screening to the model-derived PV probability surface  $P(x)$ , yielding a pre-filtered probability

89

90

91 map  $P_{pre}(x)$ .

92

We first derived elevation  $H(x)$  and slope  $S(x)$  from a digital elevation model, and set thresholds of  $H_{max} = 4,500\text{m}$  and  $S_{max} = 35^\circ$ . A topographic validity mask was then defined as:

93

94

95

$$M_T(x) = \begin{cases} 1, & H(x) < H_{max} \text{ and } S(x) < S_{max} \\ 0, & \text{otherwise} \end{cases}$$

96

where  $x$  denotes pixel location;  $M_T(x) \in \{0,1\}$  is the topographic mask;  $H(x)$  is pixel elevation (m);  $S(x)$  is pixel slope ( $^\circ$ ); and  $H_{max}$  and  $S_{max}$  are the elevation and slope thresholds, respectively.

97

98

99

Permanent snow- and ice-covered areas were identified from land-cover class labels  $L(x)$ , and glacier extents were further identified from glacier boundary data. The snow-ice-glacier validity mask  $M_C(x)$  was defined as:

100

101

102

$$M_C(x) = \begin{cases} 1, & L(x) \neq \text{Snow/Ice and } x \notin \text{Glacier} \\ 0, & \text{otherwise} \end{cases}$$

103

where  $M_C(x) \in \{0,1\}$  is the snow-ice-glacier mask;  $L(x)$  is the land-cover class label; Snow/Ice denotes the snow-and-ice category; and  $x \notin \text{Glacier}$  indicates that the pixel does not fall within glacier boundaries.

104

105

106

The two masks were combined pixel by pixel and applied to update the probability surface, producing the preliminarily filtered PV probability map  $P_{pre}(x)$ .

107

108

#### 108 **Extraction and binarization of high-confidence PV pixels**

109

The pre-filtered probability map  $P_{pre}(x)$  was then thresholded, retaining only high-confidence pixels with probability greater than or equal to 0.90. This produced an initial 10-m binary PV mask:

110

111

112

$$M_{10}(x) = T_{\square}(P_{pre}(x)) = \begin{cases} 1, & P(x) \geq 0.90 \\ 0, & \text{otherwise} \end{cases}$$

113 This threshold was chosen to maximize precision, consistent with common remote-  
 114 sensing practice for identifying medium- to large-scale artificial facilities.

### 115 **Removal of small patches**

116 Small patches in the binary image, often caused by noise, mixed pixels or local  
 117 reflectance anomalies, were removed using 8-neighbour connected-component analysis.  
 118 For each connected component  $C_i$ , the number of pixels  $|C_i|$  was compared with a  
 119 minimum patch threshold  $T_{\min}$  (50–100 pixels, corresponding to approximately 0.005–  
 120 0.01 km<sup>2</sup>). The filtered mask was defined as:

$$121 \quad M'_{10} = \bigcup_{i: |C_i| \geq T_{\min}} C_i$$

### 122 **Removal of morphologically irregular patches**

123 To further remove candidate PV patches with strongly jagged boundaries, narrow  
 124 fragmented shapes or spurious connections created by noise, we applied a joint post-  
 125 processing strategy consisting of morphological regularization, shape-consistency  
 126 screening and hole filling to the mask  $M'_{10}$ . This strategy first uses morphological  
 127 opening to suppress small protrusions and narrow connections, then evaluates shape  
 128 regularity from the retention ratio before and after opening, and finally applies  
 129 morphological closing to fill small holes and smooth boundaries.

#### 130 **(1) Morphological opening: boundary regularization and suppression of narrow 131 connections**

132 We first applied morphological opening to  $M'_{10}$  to weaken small protrusions,  
 133 serrated edges and narrow connections. Let  $S$  be the structuring element (here a  
 134  $3 \times 3$  square kernel). Morphological opening is defined as erosion followed by dilation:

$$135 \quad M_{\text{open}} = (M'_{10} \ominus S) \oplus S$$

136 where  $\ominus$  and  $\oplus$  denote binary erosion and binary dilation, respectively. To strengthen  
 137 the regularization effect, the opening operation was iterated  $n_o$  times ( $n_o = 5$ ), thereby  
 138 more effectively suppressing fragmented and highly irregular boundaries.

#### 139 **(2) Shape-consistency screening: removal of irregular patches based on overlap 140 ratio**

141 We then performed 8-neighbour connected-component analysis on  $M'_{10}$ , yielding  
 142 the set of connected patches  $\{C_i\}_{i=1}^N$ . For each patch  $C_i$ , we calculated its retention ratio  
 143 in the morphologically opened result  $M_{\text{open}}$ :

$$144 \quad r_i = \frac{|C_i \cap M_{\text{open}}|}{|C_i| + \varepsilon}$$

145 where  $\varepsilon$  is a small constant introduced to avoid division by zero ( $\varepsilon = 10^{-6}$ ). This metric  
 146 reflects the stability of each patch under morphological regularization: compact patches  
 147 with relatively regular boundaries typically retain high values of  $r_i$ , whereas elongated,  
 148 fragmented or strongly serrated patches lose substantial numbers of pixels during  
 149 opening and thus yield low  $r_i$ .

150 Using a shape-consistency threshold of  $\rho = 0.6$ , we retained only patches with  
 151  $r_i \geq \rho$ , producing the morphologically filtered mask  $M_{10}^*$ :

152

$$M_{10}^* = \bigcup_{i: r_i \geq \rho} C_i$$

153 This overlap-based screening can be regarded as an explicit constraint on the geometric  
 154 regularity of candidate patches, and it effectively removes false detections caused by  
 155 noise connections, fragmented structures or highly irregular boundaries.

156 **(3) Morphological closing: hole filling and boundary smoothing**

157 After irregular patches had been removed, we applied morphological closing to  
 158  $M_{10}^*$  to fill small internal holes, bridge minor gaps and further smooth patch boundaries.  
 159 Morphological closing, defined as dilation followed by erosion, is given by:

160 
$$M_{\text{close}} = (M_{10}^* \oplus S) \ominus S$$

161 The closing operation was iterated  $n_c$  times ( $n_c = 1$ ). Without substantially altering the  
 162 main patch geometry, this step improves spatial continuity and provides a more stable  
 163 binary segmentation result for subsequent area-based filtering of exceptionally large  
 164 patches and for scale aggregation.

165 **Removal of anomalously large patches**

166 In some environments, such as bare land, salt lakes and other highly reflective  
 167 surfaces, spatial aggregation may produce exceptionally large connected regions with  
 168 high predicted PV probability. To ensure that the mapped assets remain physically  
 169 plausible and meaningful from an engineering perspective, we applied a maximum  
 170 patch-area threshold  $A_{\text{max}}$ . Any connected patch  $C_k$  exceeding the size of the largest  
 171 currently known PV plant worldwide (approximately 40–60 km<sup>2</sup>) was removed:

172 
$$M'_{1\text{km}} = \bigcup_{k: A_k \leq A_{\text{max}}} C_k$$

173 where  $A_k$  is the area of connected patch  $C_k$ .

174 **Supplementary Figures**

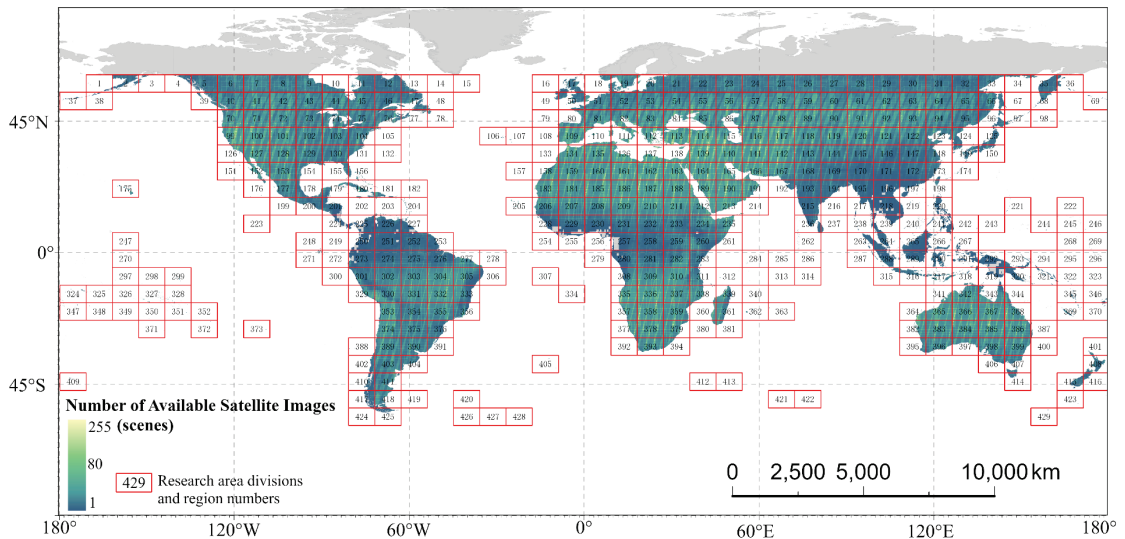

175

176 **Supplementary Fig. 1 | Global partitioning of the 60°S-60°N study area and the 429 valid tiles**

177 used in this study.

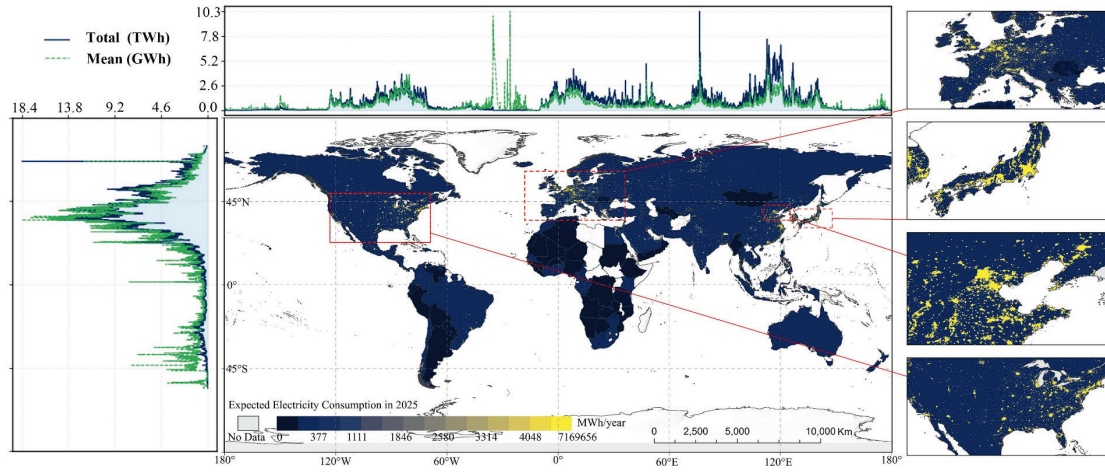

178

179 **Supplementary Fig. 2** | Global pattern of projected electricity demand in 2025 used in the PV

180 supply-demand coupling analysis.

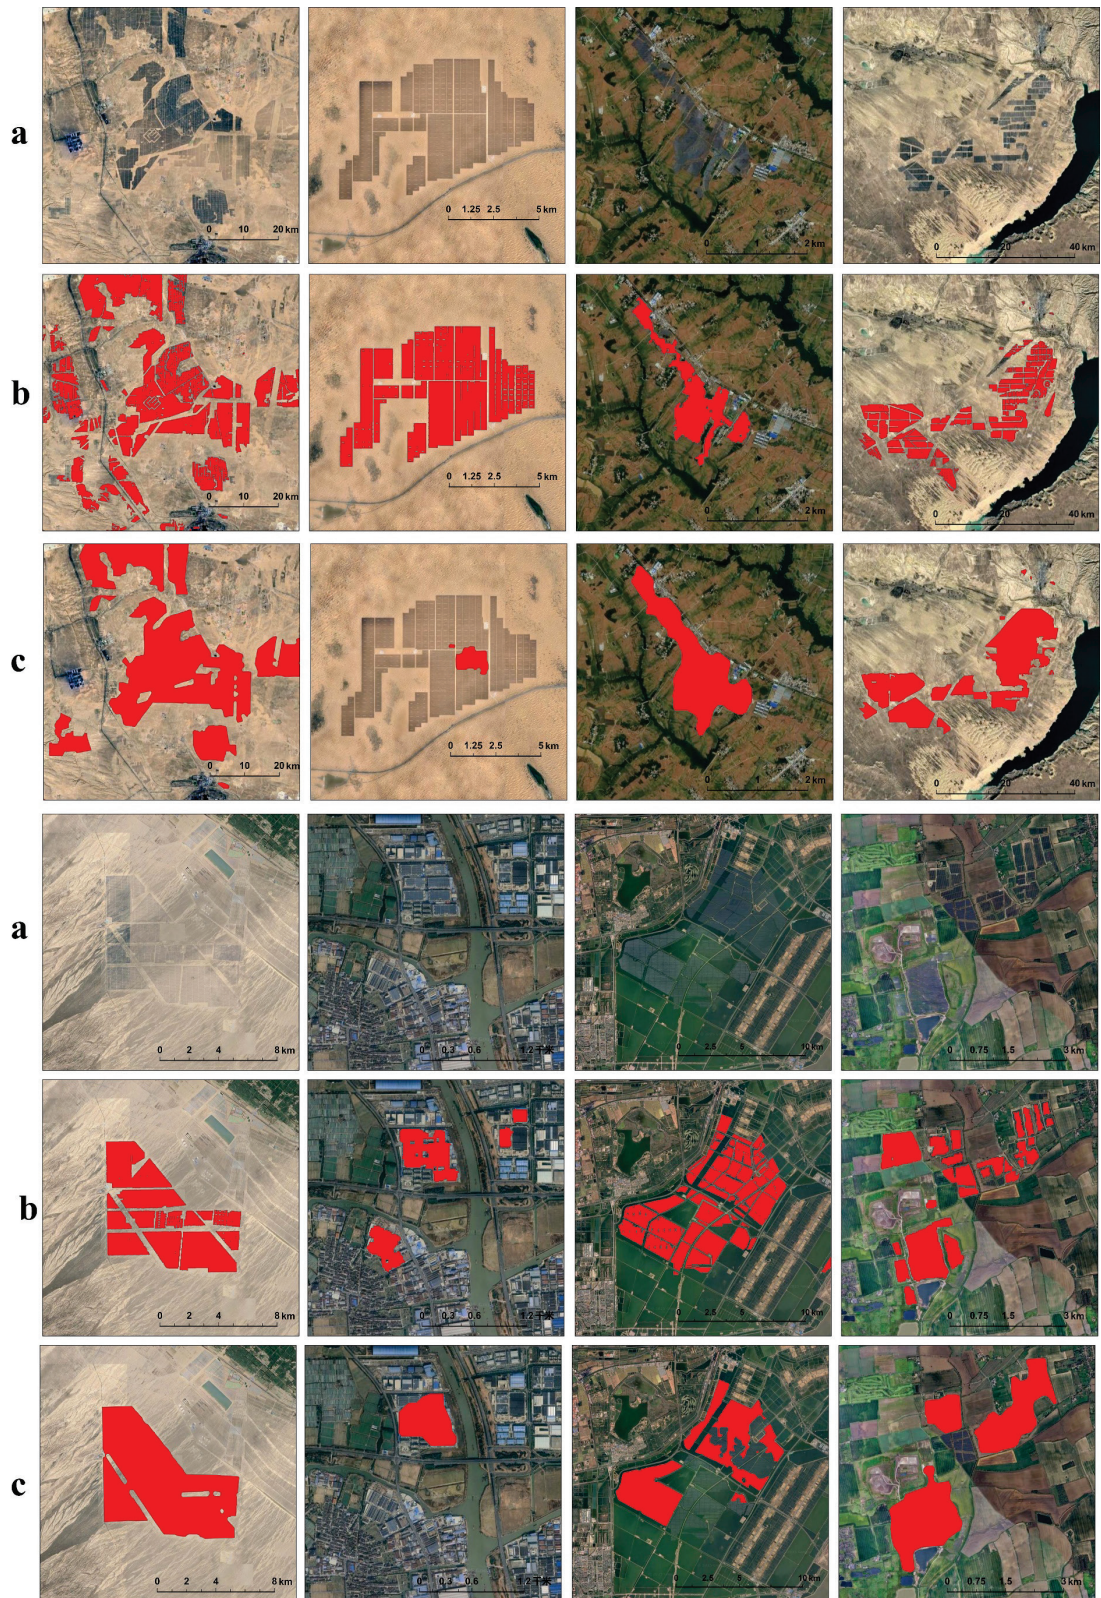

181

182 **Supplementary Fig. 3** | Representative comparisons of utility-scale PV asset delineation.(a)

183 High-resolution Google Earth imagery for representative utility-scale PV sites.(b) PV extraction

184 results produced by the model developed in this study.(c) Corresponding PV extraction results

185 from the global PV inventory dataset released by Kruitwagen et al. in 2021.

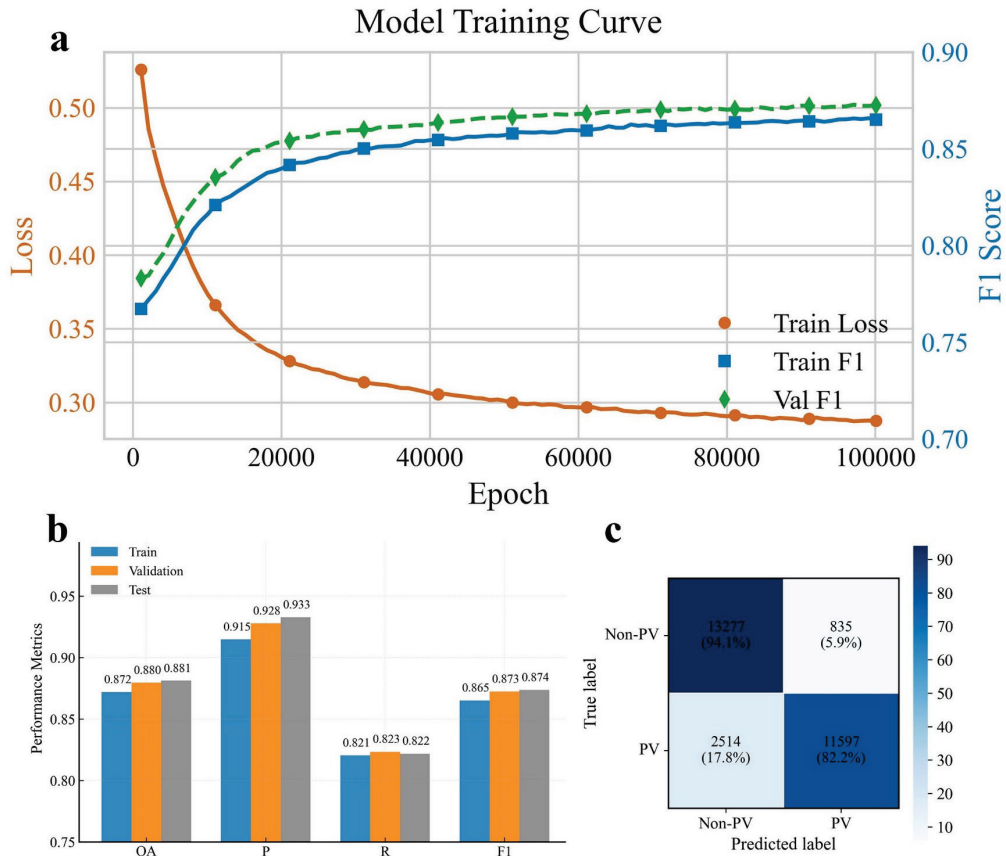

186

187 **Supplementary Fig. 4** | Training process and classification performance of the deep neural

188 network used for global mapping of utility-scale PV assets.

189

190 **Supplementary Tables**

191 **Supplementary Table. 1** | Installed capacity density by latitude band, conservatively estimated

192 based on the Land-use Control Indicators for Photovoltaic Power Station Engineering Projects

193 issued by the Ministry of Natural Resources of China

| Latitude band (°) | Installed capacity density (MW/km <sup>2</sup> ) | Corresponding $Q_i$ (Kwp/m <sup>2</sup> ) |
|-------------------|--------------------------------------------------|-------------------------------------------|
| 0-18(<18)         | 97                                               | 0.097                                     |
| 18-20             | 93                                               | 0.093                                     |
| 20-25             | 84                                               | 0.084                                     |
| 25-30             | 74                                               | 0.074                                     |
| 30-35             | 63                                               | 0.063                                     |
| 35-40             | 51                                               | 0.051                                     |
| 40-45             | 39                                               | 0.039                                     |
| 45-50             | 25                                               | 0.025                                     |
| 50-60             | 12.5                                             | 0.0125                                    |

194

195 **Supplementary Table. 2** | Architecture of the proposed FC-DNN model.

| Layer  | Type                       | Units | Activation |
|--------|----------------------------|-------|------------|
| Input  | Feature vector             | 10    | -          |
| FC1    | Fully connected (FC)       | 32    | ReLU       |
| FC2    | Fully connected (FC)       | 64    | ReLU       |
| Output | Fully Connected<br>(Dense) | 1     | Sigmoid    |

196

197 **Supplementary Table. 3** | Sentinel-2 Level-2A input bands used for global utility-scale PV

198 mapping

| Band | Spectral region | Central wavelength(nm) | Spatial resolution | Role in PV mapping                                                                                                                                                                       |
|------|-----------------|------------------------|--------------------|------------------------------------------------------------------------------------------------------------------------------------------------------------------------------------------|
| B2   | Blue            | 490                    | 10                 | Captures reflectance differences in the short visible wavelengths and helps distinguish PV panels from bare land, roads and some artificial surfaces.                                    |
| B3   | Green           | 560                    | 10                 | Helps characterize differences in surface brightness and colour, improving the separability of PV facilities from surrounding land surfaces.                                             |
| B4   | Red             | 665                    | 10                 | Used to identify differences in red-band reflectance between PV sites and vegetation, bare land and built-up areas.                                                                      |
| B5   | Red-edge1       | 705                    | 20                 | Provides red-edge information and enhances discrimination between PV facilities and vegetated backgrounds.                                                                               |
| B6   | Red-edge2       | 740                    | 20                 | Complements red-edge spectral variation and improves target-recognition stability under complex background conditions.                                                                   |
| B7   | Red-edge3       | 783                    | 20                 | Further characterizes red-edge spectral shape and helps suppress confusion with vegetation and some highly reflective backgrounds.                                                       |
| B8   | NIR             | 842                    | 10                 | Provides near-infrared reflectance information and strengthens discrimination of PV facilities from vegetation, water bodies and bare land.                                              |
| B8a  | Narrow NIR      | 865                    | 20                 | Provides narrow-band near-infrared information complementary to B8 and assists discrimination under complex land-surface conditions.                                                     |
| B11  | SWIR 1          | 1610                   | 20                 | Reflects differences in surface moisture and material properties, helping distinguish PV facilities from soil, construction materials and some bare-land backgrounds.                    |
| B12  | SWIR 2          | 2190                   | 20                 | Provides longer-wave shortwave-infrared information, enhances characterization of surface material differences, and helps reduce false positives from highly reflective non-PV surfaces. |

199

200 **Supplementary Table. 4** | Summary of public data sources used in this study

| Dataset                                                                         | Provider                                              | Variables used                                           | Application in this study                                           |
|---------------------------------------------------------------------------------|-------------------------------------------------------|----------------------------------------------------------|---------------------------------------------------------------------|
| Sentinel-2 Level-2A MSI imagery                                                 | ESA/Copernicus                                        | Surface reflectance                                      | Utility-scale PV asset mapping                                      |
| Global PV distribution location dataset                                         | Published dataset <sup>21</sup>                       | Known PV locations                                       | Positive-sample construction for PV model training                  |
| ESA WorldCover                                                                  | ESA WorldCover project                                | Land-cover classes                                       | Land-cover attribution; snow/ice screening; post-processing support |
| Digital elevation model                                                         | NASA JPL / USGS <sup>68</sup>                         | Elevation; slope                                         | Terrain filtering in PV post-processing                             |
| Long-term PV generation climatology                                             | Global Solar Atlas; ESMAP; Solargis; World Bank Group | PV generation per unit installed capacity                | Realized PV supply estimation                                       |
| Land-use Control Indicators for Photovoltaic Power Station Engineering Projects | Ministry of Natural                                   | Latitude-dependent installed-capacity density parameters | Realized PV supply estimation                                       |
| VIIRS nighttime-lights monthly composites (VCMCFG)                              | NOAA / VIIRS                                          | Nighttime radiance                                       | Electricity demand estimation                                       |
| Global 1-km gridded electricity-consumption dataset                             | Published dataset <sup>67</sup>                       | Electricity consumption                                  | Baseline demand surface for extrapolation to 2025                   |
| World Economic Outlook database (October 2025 edition)                          | IMF                                                   | GDP growth rate                                          | Electricity demand extrapolation                                    |
| GHS-POP R2023A                                                                  | JRC / GHSL                                            | Population distribution                                  | Population-weighted interpretation of under-coverage                |
| Economically developable PV potential dataset                                   | Published dataset <sup>43</sup>                       | Developable PV potential                                 | Scenario-based allocation; potential-centre extraction              |
